# Supplementary material for: Diabetes and Prostate Cancer Outcomes in Obese and Nonobese Men After Radical Prostatectomy
Source: PubMed Central journal article supplement (PMC8220304; doi:10.1093/jncics/pkab023), 2021-03-09
Supplement: pkab023_supplementary_data.pdf [file pkab023_supplementary_data.pdf]

Supplementary Table 1. Comparison between excluded and included patients.

|                                                  | Excluded          |                   | p value              |
|--------------------------------------------------|-------------------|-------------------|----------------------|
|                                                  | Yes<br>(N=1277)   | No<br>(N=4688)    |                      |
| Age, <i>median</i> (Q1, Q3)                      | 65 (61, 69)       | 62 (58, 66)       | <0.001 <sup>a</sup>  |
| Race, <i>n</i> (%)                               |                   |                   | <0.001 <sup>b</sup>  |
| White                                            | 1007 (80)         | 2710 (58)         |                      |
| Black                                            | 214 (17)          | 1822 (39)         |                      |
| Other                                            | 35 (3)            | 156 (3)           |                      |
| Missing                                          | 21                | 0                 |                      |
| BMI (kg/m <sup>2</sup> ), <i>median</i> (Q1, Q3) | 27.3 (24.5, 30.4) | 28.1 (25.4, 31.3) | <0.001 <sup>1a</sup> |
| BMI (kg/m <sup>2</sup> ), <i>n</i> (%)           |                   |                   | 0.007 <sup>b</sup>   |
| <30                                              | 408 (72)          | 3128 (67)         |                      |
| >=30                                             | 156 (28)          | 1560 (33)         |                      |
| Missing                                          | 713               | 0                 |                      |
| Diabetic at time of surgery, <i>n</i> (%)        |                   |                   | <0.001 <sup>b</sup>  |
| Yes                                              | 139 (12)          | 955 (20)          |                      |
| No                                               | 996 (88)          | 3733 (80)         |                      |
| Missing                                          | 142               | 0                 |                      |
| Year of surgery, <i>median</i> (Q1, Q3)          | 1994 (1992, 1997) | 2008 (2003, 2012) | <0.001 <sup>a</sup>  |
| Surgery center, <i>n</i> (%)                     |                   |                   | <0.001 <sup>b</sup>  |
| West LA                                          | 83 (6)            | 994 (21)          |                      |
| Palo Alto                                        | 103 (8)           | 528 (11)          |                      |
| Augusta                                          | 81 (6)            | 976 (21)          |                      |
| Durham                                           | 158 (12)          | 948 (20)          |                      |
| San Diego                                        | 512 (40)          | 753 (16)          |                      |
| Asheville                                        | 340 (27)          | 489 (10)          |                      |
| PSA (ng/mL) , <i>median</i> (Q1, Q3)             | 7.1 (4.6, 12.0)   | 6.4 (4.8, 9.7)    | 0.001 <sup>a</sup>   |
| Clinical stage, <i>n</i> (%)                     |                   |                   | <0.001 <sup>b</sup>  |
| T1                                               | 339 (27)          | 2883 (61)         |                      |
| T2/T3                                            | 938 (73)          | 1805 (39)         |                      |
| Pre-op grade group, <i>n</i> (%)                 |                   |                   | <0.001 <sup>b</sup>  |
| 1                                                | 523 (65)          | 2001 (43)         |                      |
| 2                                                | 150 (19)          | 1350 (29)         |                      |
| 3-5                                              | 132 (16)          | 1337 (29)         |                      |
| Missing                                          | 472               | 0                 |                      |
| Seminal vesicle invasion, <i>n</i> (%)           |                   |                   | 0.005 <sup>b</sup>   |
| Yes                                              | 157 (13)          | 487 (10)          |                      |
| No                                               | 1026 (87)         | 4201 (90)         |                      |
| Missing                                          | 94                | 0                 |                      |
|                                                  |                   |                   |                      |
|                                                  |                   |                   |                      |
|                                                  |                   |                   |                      |

|                                                           | Excluded            |                    | p value             |
|-----------------------------------------------------------|---------------------|--------------------|---------------------|
|                                                           | Yes<br>(N=1277)     | No<br>(N=4688)     |                     |
| Extracapsular extension, <i>n</i> (%)                     |                     |                    | 0.005 <sup>b</sup>  |
| Yes                                                       | 268 (24)            | 954 (20)           |                     |
| No                                                        | 841 (76)            | 3734 (80)          |                     |
| Missing                                                   | 168                 | 0                  |                     |
| Positive surgical margins, <i>n</i> (%)                   |                     |                    | 0.100 <sup>b</sup>  |
| Yes                                                       | 445 (38)            | 1883 (40)          |                     |
| No                                                        | 740 (62)            | 2805 (60)          |                     |
| Missing                                                   | 92                  | 0                  |                     |
| Lymph node involvement, <i>n</i> (%)                      |                     |                    | 0.248 <sup>b</sup>  |
| Yes                                                       | 24 (2)              | 125 (3)            |                     |
| No                                                        | 781 (61)            | 2878 (61)          |                     |
| Not done                                                  | 472 (37)            | 1685 (36)          |                     |
| Post-op grade group, <i>n</i> (%)                         |                     |                    | <0.001 <sup>b</sup> |
| 1                                                         | 427 (47)            | 1282 (27)          |                     |
| 2                                                         | 270 (30)            | 1876 (40)          |                     |
| 3-5                                                       | 209 (23)            | 1530 (33)          |                     |
| Missing                                                   | 371                 | 0                  |                     |
| Months from surgery to metastasis, <i>median</i> (Q1, Q3) | 141.1 (66.6, 213.4) | 92.5 (50.8, 145.2) | <0.001 <sup>a</sup> |

<sup>a</sup>Wilcoxon rank sum test; <sup>b</sup>Chi-Square test.

Missing data were not included in computing statistical tests.
